# Supplementary material for: Ecosystem Interactions Underlie the Spread of Avian Influenza A Viruses with Pandemic Potential
Source: PubMed Central journal article supplement (PMC4864295; doi:10.1371/journal.ppat.1005620), 2016-05-11
Supplement: ppat.1005620.s002.pdf [file ppat.1005620.s002.pdf]

**Table S1: Accession numbers of newly sequenced viruses**

| Strain name                                                                 | PB2      | PB1      | PA       | HA       | NP       | NA       | M        | NS       |
|-----------------------------------------------------------------------------|----------|----------|----------|----------|----------|----------|----------|----------|
| A/ruddy turnstone/Delaware Bay/215/1996(H9)                                 | CY101222 | CY101221 | CY101219 | CY101211 | CY101215 | CY101214 | CY101213 | CY101217 |
| A/shorebird/Delaware Bay/260/1996(H9N9)                                     | CY101231 | CY101230 | CY101229 | CY101224 | CY101227 | CY101226 | CY101225 | CY101228 |
| A/shorebird/Delaware Bay/133/2002(H9N1)                                     | CY101322 | CY101321 | CY101320 | CY101315 | CY101318 | CY101317 | CY101316 | CY101319 |
| A/shorebird/Delaware Bay/73/2003(H9N2)                                      | CY101329 |          | CY101328 | CY101323 | CY101326 | CY101325 | CY101324 | CY101327 |
| A/laughing gull/Delaware Bay/2718/1987(H9N5)                                | CY101397 | CY101396 | CY101395 | CY101390 | CY101393 | CY101392 | CY101391 | CY101394 |
| A/ruddy turnstone/Delaware Bay/2774/1987(H9N5)                              | CY101405 | CY101404 | CY101403 | CY101398 | CY101401 | CY101400 | CY101399 | CY101402 |
| A/ruddy turnstone/Delaware Bay/2795/1987(H9N5)                              | CY101413 | CY101412 | CY101411 | CY101406 | CY101409 | CY101408 | CY101407 | CY101410 |
| A/ruddy turnstone/Delaware Bay/2830/1987(H9N5)                              | CY101421 | CY101420 | CY101419 | CY101414 | CY101417 | CY101416 | CY101415 | CY101418 |
| A/ruddy turnstone/Virginia/2297/1988(H9N9)                                  | CY101514 | CY101513 | CY101512 | CY101507 | CY101510 | CY101509 | CY101508 | CY101511 |
| A/laughing gull/Delaware/2971/1988(H9N9)                                    | CY101546 | CY101545 | CY101544 | CY101539 | CY101542 | CY101541 | CY101540 | CY101543 |
| A/shorebird/Delaware Bay/31/1996(H9N7)                                      | CY102195 | CY102194 | CY102193 | CY102188 | CY102191 | CY102190 | CY102189 | CY102192 |
| A/ruddy turnstone/Delaware Bay/261/1999(H9N7)                               | CY102539 | CY102538 | CY102537 | CY102532 | CY102535 | CY102534 | CY102533 | CY102536 |
| A/shorebird/Delaware Bay/277/2000(H9N7)                                     | CY102640 | CY102639 | CY102638 | CY102633 | CY102636 | CY102635 | CY102634 | CY102637 |
| A/laughing gull/Delaware Bay/5/2003(H9N1)                                   | CY102727 | CY102726 | CY102725 | CY102720 | CY102723 | CY102722 | CY102721 | CY102724 |
| A/shorebird/Delaware Bay/127/2003(H9N2)                                     | CY102735 | CY102734 | CY102733 | CY102728 | CY102731 | CY102730 | CY102729 | CY102732 |
| A/shorebird/Delaware Bay/246/2003(H9N5)                                     | CY102743 | CY102742 | CY102741 | CY102736 | CY102739 | CY102738 | CY102737 | CY102740 |
| A/shorebird/Delaware Bay/283/2003(H9N1)                                     | CY102751 | CY102750 | CY102749 | CY102744 | CY102747 | CY102746 | CY102745 | CY102748 |
| A/sanderling/Delaware Bay/449/2006(H9N2)                                    | CY103006 | CY103005 | CY103004 | CY102999 | CY103002 | CY103001 | CY103000 | CY103003 |
| A/ruddy turnstone/Delaware Bay/2813/1987(H9 mixed)                          | CY136367 | CY136366 | CY136365 | CY136358 | CY136363 | CY136362 | CY136359 | CY136364 |
| A/northern shoveler/Interior Alaska/8BM3470/2008 (H9N2)                     | CY079653 | CY079652 | CY079651 | CY079646 | CY079649 | CY079648 | CY079647 | CY079650 |
| A/American green-winged teal/Interior Alaska/<br>10BM16586R0/2010(H9 mixed) | CY125741 | CY125740 | CY125739 | CY125733 | CY125737 | CY125735 | CY125734 | CY125738 |
| A/northern pintail/Interior Alaska/<br>10BM14807R2/2010(H9N2)               | CY125757 | CY125756 | CY125755 | CY125750 | CY125753 | CY125752 | CY125751 | CY125754 |
| A/northern shoveler/Interior Alaska/<br>10BM16764R0/2010(H9N2)              | CY125765 | CY125764 | CY125763 | CY125758 | CY125761 | CY125760 | CY125759 | CY125762 |
| A/ruddy turnstone/Delaware Bay/201/1996(H9 mixed)                           | CY126491 | CY126490 | CY126489 | CY126482 | CY126486 | CY126485 | CY126484 | CY126487 |
| A/mallard/Interior Alaska/10BM02980R0/2010(H9N2)                            | CY130460 | CY130459 | CY130458 | CY130453 | CY130456 | CY130455 | CY130454 | CY130457 |
| A/green-winged teal/Wisconsin/228/1976 (H9N2)                               | CY180146 | CY180145 | CY180144 | CY180139 | CY180142 | CY180141 | CY180140 | CY180143 |
| A/green-winged teal/Wisconsin/562/1979 (H9N1)                               | CY180715 | CY180714 | CY180713 | CY180708 | CY180711 | CY180710 | CY180709 | CY180712 |
| A/mallard/Wisconsin/24/1974 (H9N1)                                          | CY181344 | CY181343 | CY181342 | CY181337 | CY181340 | CY181339 | CY181338 | CY181341 |

|                                                   |                       |                       |                       |          |          |                       |                       |                       |
|---------------------------------------------------|-----------------------|-----------------------|-----------------------|----------|----------|-----------------------|-----------------------|-----------------------|
| A/blue-winged teal/Alberta/142/1992(H6N8)         | CY126975              | CY126974              | CY126973              | CY126968 | CY126971 | CY126970              | CY126969              | CY126972              |
| A/blue-winged teal/Alberta/599/1986(H6N2)         | CY126807              | CY126806              | CY126805              | CY126800 | CY126803 | CY126802              | CY126801              | CY126804              |
| A/green-winged teal/Alberta/107/1992(H6N8)        | CY126967              | CY126966              | CY126965              | CY126960 | CY126963 | CY126962              | CY126961              | CY126964              |
| A/gull/Delaware Bay/18/2000(H6N1)                 | CY127621              | CY127620              | CY127619              | CY127614 | CY127617 | CY127616              | CY127615              | CY127618              |
| A/herring gull/Delaware Bay/77/1994(H6N8)         | CY127055              | CY127054              | CY127053              | CY127048 | CY127051 | CY127050              | CY127049              | CY127052              |
| A/herring gull/New Jersey/413/1989(H6N3)          | CY126767              | CY126766              | CY126765              | CY126760 | CY126763 | CY126762              | CY126761              | CY126764              |
| A/laughing gull/Delaware Bay/208/1994(H6N3)       | CY127071              | CY127070              | CY127069              | CY127064 | CY127067 | CY127066              | CY127065              | CY127068              |
| A/laughing gull/Delaware Bay/261/1991(H6N8)       | CY126935              | CY126934              | CY126933              | CY126928 | CY126931 | CY126930              | CY126929              | CY126932              |
| A/laughing gull/Delaware Bay/4/1990(H6N8)         | CY126879              | CY126878              | CY126877              | CY126872 | CY126875 | CY126874              | CY126873              | CY126876              |
| A/laughing gull/New Jersey/177/1990(H6N8)         | CY126887              | CY126886              | CY126885              | CY126880 | CY126883 | CY126882              | CY126881              | CY126884              |
| A/mallard/Alberta/110/1990(H6 mixed)              | CY136417,<br>CY136418 | CY136416              | CY136415              | CY136406 | CY136412 | CY136410,<br>CY136411 | CY136408,<br>CY136409 | CY136413,<br>CY136414 |
| A/mallard/Alberta/152/1992(H6N8)                  | CY126991              | CY126990              | CY126989              | CY126984 | CY126987 | CY126986              | CY126985              | CY126988              |
| A/mallard/Alberta/174/1989(H6N8)                  | CY126847              | CY126846              | CY126845              | CY126840 | CY126843 | CY126842              | CY126841              | CY126844              |
| A/mallard/Alberta/186/1987(H6N2)                  | CY136661              | CY136660              | CY136659              | CY136654 | CY136657 | CY136656              | CY136655              | CY136658              |
| A/mallard/Alberta/19/1994(H6N8)                   | CY127095              | CY127094              | CY127093              | CY127088 | CY127091 | CY127090              | CY127089              | CY127092              |
| A/mallard/Alberta/195/1987(H6N2)                  | CY136669              | CY136668              | CY136667              | CY136662 | CY136665 | CY136664              | CY136663              | CY136666              |
| A/mallard/Alberta/196/1987(H6N2)                  | CY136677              | CY136676              | CY136675              | CY136670 | CY136673 | CY136672              | CY136671              | CY136674              |
| A/mallard/Alberta/196/1989(H6N8)                  | CY126458              | CY126457              | CY126456              | CY126451 | CY126454 | CY126453              | CY126452              | CY126455              |
| A/mallard/Alberta/197/1987(H6N2)                  | CY136685              | CY136684              | CY136683              | CY136678 | CY136681 | CY136680              | CY136679              | CY136682              |
| A/mallard/Alberta/203/1992(H6N5)                  | CY126999              | CY126998              | CY126997              | CY126992 | CY126995 | CY126994              | CY126993              | CY126996              |
| A/mallard/Alberta/207/1990(H6N3)                  | CY126903              | CY126902              | CY126901              | CY126896 | CY126899 | CY126898              | CY126897              | CY126900              |
| A/mallard/Alberta/215/1999(H6 mixed)              | CY127613              | CY127612              | CY127610,<br>CY127611 | CY127604 | CY127608 | CY127606,<br>CY127607 | CY127605              | CY127609              |
| A/mallard/Alberta/232/1994(H6N8)                  | CY127127              | CY127126              | CY127125              | CY127120 | CY127123 | CY127122              | CY127121              | CY127124              |
| A/mallard/Alberta/250/1990(H6N3)                  | CY126911              | CY126910              | CY126909              | CY126904 | CY126907 | CY126906              | CY126905              | CY126908              |
| A/mallard/Alberta/257/1990(H6N3)                  | CY126919              | CY126918              | CY126917              | CY126912 | CY126915 | CY126914              | CY126913              | CY126916              |
| A/mallard/Alberta/260/1987(H6N2)                  | CY136709              | CY136708              | CY136707              | CY136702 | CY136705 | CY136704              | CY136703              | CY136706              |
| A/mallard/Alberta/264/1986(H6N2)                  | CY126360              | CY126359              | CY126358              | CY126353 |          | CY126356              | CY126355              | CY126357              |
| A/mallard/Alberta/270/1986(H6N2)                  | CY126775              | CY126774              | CY126773              | CY126768 | CY126771 | CY126770              | CY126769              | CY126772              |
| A/mallard/Alberta/294/1987(H6 mixed)              | CY136728              | CY136727              | CY136726              | CY136719 | CY136723 | CY136722              | CY136720,<br>CY136721 | CY136724,<br>CY136725 |
| A/mallard/Alberta/311/1986(H6N2)                  | CY126368              | CY126367              | CY126366              | CY126361 | CY126364 | CY126363              | CY126362              | CY126365              |
| A/mallard/Alberta/4/1994(H6N8)                    | CY127079              | CY127078              | CY127077              | CY127072 | CY127075 | CY127074              | CY127073              | CY127076              |
| A/mallard/Alberta/57/1994(H6N8)                   | CY126466              | CY126465              | CY126464              | CY126459 | CY126462 | CY126461              | CY126460              | CY126463              |
| A/mallard/Alberta/58/1989(H6N4)                   | CY126449,<br>CY126450 | CY126447,<br>CY126448 | CY126446              | CY126441 | CY126444 | CY126443              | CY126442              | CY126445              |
| A/mallard/Alberta/68/1994(H6N8)                   | CY127111              | CY127110              | CY127109              | CY127104 | CY127107 | CY127106              | CY127105              | CY127108              |
| A/pintail/Alberta/144/1989(H6N8)                  | CY126815              | CY126814              | CY126813              | CY126808 | CY126811 | CY126810              | CY126809              | CY126812              |
| A/pintail/Alberta/145/1990(H6N3)                  | CY136760              | CY136759              | CY136758              | CY136753 | CY136756 | CY136755              | CY136754              | CY136757              |
| A/pintail/Alberta/155/1994(H6N8)                  | CY131983              | CY131982              | CY131981              | CY131976 | CY131979 | CY131978              | CY131977              | CY131980              |
| A/pintail/Alberta/267/1987(H6N2)                  | CY136717              | CY136716              | CY136715              | CY136710 | CY136713 | CY136712              | CY136711              | CY136714              |
| A/pintail/Alberta/314/1986(H6N2)                  | CY126383              | CY126382              | CY126381              | CY126376 | CY126379 | CY126378              | CY126377              | CY126380              |
| A/pintail/Alberta/480/1986(H6N2)                  | CY126411,<br>CY126412 | CY126410              | CY126409              | CY126404 | CY126407 | CY126406              | CY126405              | CY126408              |
| A/pintail/Alberta/87/1993(H6N8)                   | CY127031              | CY127030              | CY127029              | CY127024 | CY127027 | CY127026              | CY127025              | CY127028              |
| A/redhead/Alberta/291/1994(H6N8)                  | CY127135              | CY127134              | CY127133              | CY127128 | CY127131 | CY127130              | CY127129              | CY127132              |
| A/ruddy turnstone/Delaware Bay/113/1998(H6N8)     | CY127428              | CY127427              | CY127426              | CY127421 | CY127424 | CY127423              | CY127422              | CY127425              |
| A/ruddy turnstone/Delaware Bay/118/2007(H6 mixed) | CY127782              | CY127781              | CY127780              | CY127774 | CY127778 | CY127777              | CY127776              | CY127779              |
| A/ruddy turnstone/Delaware Bay/125/1998(H6 mixed) | CY126502,<br>CY126503 | CY126501              | CY126499,<br>CY126500 | CY126493 | CY126497 | CY126495,<br>CY126496 | CY126494              | CY126498              |
| A/ruddy turnstone/Delaware Bay/126/1994(H6N1)     | CY136789              | CY136788              | CY136787              | CY136782 | CY136785 | CY136784              | CY136783              | CY136786              |
| A/ruddy turnstone/Delaware Bay/136/2007(H6N1)     | CY127790              | CY127789              | CY127788              | CY127783 | CY127786 | CY127785              | CY127784              | CY127787              |
| A/ruddy turnstone/Delaware Bay/162/1994(H6N2)     | CY127063              | CY127062              | CY127061              | CY127056 | CY127059 | CY127058              | CY127057              | CY127060              |
| A/ruddy turnstone/Delaware Bay/173/2007(H6N2)     | CY127798              | CY127797              | CY127796              | CY127791 | CY127794 | CY127793              | CY127792              | CY127795              |
| A/ruddy turnstone/Delaware Bay/190/2002(H6 mixed) | CY126554              | CY126553              | CY126552              | CY126546 | CY126550 | CY126548,<br>CY126549 | CY126547              | CY126551              |
| A/ruddy turnstone/Delaware Bay/203/1996(H6N2)     | CY127396              | CY127395              | CY127394              | CY127389 | CY127392 | CY127391              | CY127390              | CY127393              |
| A/ruddy turnstone/Delaware Bay/255/1991(H6N2)     | CY126927              | CY126926              | CY126925              | CY126920 | CY126923 | CY126922              | CY126921              | CY126924              |
