# Supplementary material for: Ecosystem Interactions Underlie the Spread of Avian Influenza A Viruses with Pandemic Potential
Source: PubMed Central journal article supplement (PMC4864295; doi:10.1371/journal.ppat.1005620), 2016-05-11
Supplement: ppat.1005620.s003.pdf [file ppat.1005620.s003.pdf]

**Table S2.** Dataset summary before and after subsampling.

| <b>H9 AIV Sequences</b>  |                   |               |                   |         |         |                |                |           |             |             |
|--------------------------|-------------------|---------------|-------------------|---------|---------|----------------|----------------|-----------|-------------|-------------|
|                          | Japan/<br>S Korea | E China       | C China           | W China | SE Asia | S Asia         | Middle<br>East | Europe    | N America   | Total       |
| Domestic                 | 100               | 570           | 816               | 129     | 17      | 91             | 326            | 11        | 9           | 2069        |
| Wild                     | 16                | 13            | 38                | 0       | 1       | 2              | 21             | 25        | 98          | 214         |
| Region total             | 116               | 583           | 854               | 129     | 18      | 93             | 347            | 36        | 107         | <b>2283</b> |
| <i>After subsampling</i> |                   |               |                   |         |         |                |                |           |             |             |
| Domestic                 | 100               | 134           | 141               | 94      | 17      | 91             | 189            | 11        | 0           | 777         |
| Wild                     | 16                | 13            | 38                | 0       | 1       | 2              | 21             | 25        | 62          | 178         |
| Region total             | 116               | 147           | 179               | 94      | 18      | 93             | 210            | 36        | 62          | <b>955</b>  |
| <b>H3 AIV Sequences</b>  |                   |               |                   |         |         |                |                |           |             |             |
|                          |                   | North<br>Asia | Japan/<br>S Korea | E China | C China | SE Asia        | Europe         | N America | Total       |             |
| Domestic                 |                   | 0             | 62                | 23      | 31      | 24             | 0              | 3         | 143         |             |
| Wild                     |                   | 46            | 52                | 2       | 8       | 8              | 86             | 1039      | 1241        |             |
| Region total             |                   | 46            | 114               | 25      | 39      | 32             | 86             | 1042      | <b>1384</b> |             |
| <i>After subsampling</i> |                   |               |                   |         |         |                |                |           |             |             |
| Domestic                 |                   | 0             | 46                | 23      | 31      | 24             | 0              | 3         | <b>127</b>  |             |
| Wild                     |                   | 46            | 52                | 2       | 8       | 8              | 63             | 508       | 687         |             |
| Region total             |                   | 46            | 98                | 25      | 39      | 32             | 63             | 511       | <b>814</b>  |             |
| <b>H6 AIV Sequences</b>  |                   |               |                   |         |         |                |                |           |             |             |
|                          | Japan/<br>S Korea | E China       | C China           | W China | SE Asia | Middle<br>East | Europe         | N America | Total       |             |
| Domestic                 | 66                | 182           | 396               | 17      | 14      | 0              | 24             | 28        | 727         |             |
| Wild                     | 20                | 17            | 31                | 0       | 8       | 5              | 109            | 430       | 620         |             |
| Region total             | 86                | 199           | 427               | 17      | 22      | 5              | 133            | 458       | <b>1347</b> |             |
| <i>After subsampling</i> |                   |               |                   |         |         |                |                |           |             |             |
| Domestic                 | 66                | 87            | 202               | 17      | 14      | 0              | 22             | 25        | 433         |             |
| Wild                     | 18                | 17            | 31                | 0       | 8       | 5              | 88             | 288       | 455         |             |
| Region total             | 84                | 104           | 233               | 17      | 22      | 5              | 110            | 313       | <b>888</b>  |             |
