# Supplementary material for: Ecosystem Interactions Underlie the Spread of Avian Influenza A Viruses with Pandemic Potential
Source: PubMed Central journal article supplement (PMC4864295; doi:10.1371/journal.ppat.1005620), 2016-05-11
Supplement: ppat.1005620.s004.pdf [file ppat.1005620.s004.pdf]

**Table S3.** Mean migration rates of H3 subtype viruses between avian ecosystems across sampling locations. Statistically supported interactions are shown in bold.

| Origin   |                     | Destination                                    |                                                |                                                |                                                |                                                |                                                |                                                |                                                |                                                |                                                |        |                                                |
|----------|---------------------|------------------------------------------------|------------------------------------------------|------------------------------------------------|------------------------------------------------|------------------------------------------------|------------------------------------------------|------------------------------------------------|------------------------------------------------|------------------------------------------------|------------------------------------------------|--------|------------------------------------------------|
|          |                     | Domestic                                       |                                                |                                                |                                                |                                                |                                                | Wild                                           |                                                |                                                |                                                |        |                                                |
|          |                     | Japan/<br>S Korea                              | E China                                        | C China                                        | SE Asia                                        | North<br>America                               | Russia/<br>Mongolia                            | Japan/<br>S Korea                              | E China                                        | C China                                        | SE Asia                                        | Europe | North<br>America                               |
| Domestic | Japan/<br>S Korea   | -                                              | 0.36                                           | 0.31                                           | 0.32                                           | 0.36                                           | 0.27                                           | <b>1.19<sup>§</sup></b><br><b>(0.20, 2.46)</b> | 0.39                                           | 0.31                                           | 0.29                                           | 0.33   | 0.33                                           |
|          | E China             | 0.53                                           | -                                              | 0.73                                           | <b>1.18<sup>†</sup></b><br><b>(0.03, 2.55)</b> | 0.47                                           | 0.41                                           | 0.50                                           | 0.41                                           | 0.44                                           | 0.38                                           | 0.44   | 0.44                                           |
|          | C China             | 0.47                                           | <b>3.46<sup>§</sup></b><br><b>(1.36, 5.88)</b> | -                                              | 1.11                                           | 0.40                                           | 1.08                                           | 1.73                                           | 0.39                                           | <b>0.99<sup>§</sup></b><br><b>(0.10, 2.10)</b> | 0.33                                           | 0.42   | 0.60                                           |
|          | SE Asia             | 0.40                                           | 0.44                                           | <b>1.16<sup>§</sup></b><br><b>(0.10, 2.59)</b> | -                                              | 0.48                                           | 0.38                                           | 0.41                                           | 0.45                                           | 0.40                                           | <b>2.17<sup>§</sup></b><br><b>(0.62, 3.95)</b> | 0.35   | 0.40                                           |
|          | North<br>America    | 0.37                                           | 0.36                                           | 0.36                                           | 0.37                                           | -                                              | 0.35                                           | 0.63                                           | 0.40                                           | 0.36                                           | 0.38                                           | 0.40   | 0.40                                           |
|          | Russia/<br>Mongolia | 0.47                                           | 0.70                                           | <b>1.04<sup>†</sup></b><br><b>(0.01, 2.95)</b> | <b>2.18<sup>§</sup></b><br><b>(0.70, 4.02)</b> | 0.41                                           | -                                              | 1.51                                           | 0.38                                           | 0.58                                           | 0.51                                           | 0.31   | 0.74                                           |
| Wild     | Japan/<br>S Korea   | <b>0.59<sup>§</sup></b><br><b>(0.04, 1.34)</b> | 0.84                                           | <b>2.19<sup>†</sup></b><br><b>(0.26, 4.10)</b> | <b>1.05<sup>§</sup></b><br><b>(0.10, 2.19)</b> | 0.42                                           | <b>1.85<sup>†</sup></b><br><b>(0.48, 3.49)</b> | -                                              | <b>0.41<sup>†</sup></b><br><b>(0.01, 1.03)</b> | 0.54                                           | 0.24                                           | 0.71   | <b>1.06<sup>§</sup></b><br><b>(0.17, 2.14)</b> |
|          | E China             | 0.35                                           | 0.38                                           | 0.39                                           | 0.41                                           | 0.48                                           | 0.38                                           | 0.38                                           | -                                              | 0.36                                           | 0.37                                           | 0.41   | 0.40                                           |
|          | C China             | 0.39                                           | 0.38                                           | 0.42                                           | 0.40                                           | 0.44                                           | 0.37                                           | 0.40                                           | 0.42                                           | -                                              | 0.37                                           | 0.39   | 0.41                                           |
|          | SE Asia             | 0.38                                           | 0.36                                           | 0.39                                           | 0.39                                           | 0.42                                           | 0.39                                           | 0.37                                           | 0.37                                           | 0.38                                           | -                                              | 0.38   | 0.39                                           |
|          | Europe              | 0.22                                           | 0.24                                           | 0.67                                           | 0.19                                           | 0.24                                           | <b>0.69<sup>†</sup></b><br><b>(0.04, 1.58)</b> | 0.98                                           | 0.28                                           | 0.20                                           | 0.22                                           | -      | 0.51                                           |
|          | North<br>America    | 0.14                                           | 0.08                                           | 0.11                                           | 0.09                                           | <b>0.29<sup>§</sup></b><br><b>(0.04, 0.63)</b> | 0.10                                           | <b>0.19<sup>†</sup></b><br><b>(0.00, 0.47)</b> | 0.10                                           | 0.09                                           | 0.10                                           | 0.17   | -                                              |

BSSV statistically supported migration rates with 95% Bayesian credible intervals (BCI), where the Bayes factor was >10. <sup>†</sup> 30 > BF ≥ 100; <sup>§</sup> BF > 100
