# Supplementary material for: Ecosystem Interactions Underlie the Spread of Avian Influenza A Viruses with Pandemic Potential
Source: PubMed Central journal article supplement (PMC4864295; doi:10.1371/journal.ppat.1005620), 2016-05-11
Supplement: ppat.1005620.s005.pdf [file ppat.1005620.s005.pdf]

**Table S4.** Mean migration rates of H6 subtype viruses between avian ecosystems across sampling locations. Statistically supported interactions are shown in bold.

| Origin   |                   | Destination                                    |                                                |                                                |                                                |                                                |                                                |                                                |                                                |                                                |                                                |                                                |                                                |                                                |                                                |
|----------|-------------------|------------------------------------------------|------------------------------------------------|------------------------------------------------|------------------------------------------------|------------------------------------------------|------------------------------------------------|------------------------------------------------|------------------------------------------------|------------------------------------------------|------------------------------------------------|------------------------------------------------|------------------------------------------------|------------------------------------------------|------------------------------------------------|
|          |                   | Domestic                                       |                                                |                                                |                                                |                                                |                                                |                                                | Wild                                           |                                                |                                                |                                                |                                                |                                                |                                                |
|          |                   | Japan/<br>S Korea                              | E China                                        | C China                                        | W China                                        | SE Asia                                        | Europe                                         | North<br>America                               | Japan/<br>S Korea                              | E China                                        | C China                                        | SE Asia                                        | Middle<br>East                                 | Europe                                         | North<br>America                               |
| Domestic | Japan/<br>S Korea | -                                              | 0.33                                           | 0.32                                           | 0.19                                           | 0.19                                           | 0.15                                           | 0.15                                           | 0.68                                           | 0.29                                           | 0.23                                           | 0.24                                           | 0.26                                           | 0.29                                           | 0.20                                           |
|          | E China           | 0.68                                           | -                                              | 1.26                                           | 0.33                                           | 1.10                                           | 0.26                                           | 0.17                                           | <b>0.56<sup>†</sup></b><br><b>(0.01, 1.42)</b> | 0.74                                           | 0.45                                           | 0.26                                           | 0.32                                           | 0.47                                           | 0.44                                           |
|          | C China           | 0.59                                           | <b>2.42<sup>§</sup></b><br><b>(1.07, 4.01)</b> | -                                              | <b>0.61<sup>§</sup></b><br><b>(0.08, 1.28)</b> | <b>0.65<sup>†</sup></b><br><b>(0.09, 1.29)</b> | 0.17                                           | 0.09                                           | 0.56                                           | <b>0.61<sup>†</sup></b><br><b>(0.02, 1.43)</b> | <b>2.55<sup>§</sup></b><br><b>(1.23, 3.94)</b> | 0.21                                           | 0.14                                           | 0.31                                           | 0.59                                           |
|          | W China           | 0.42                                           | 0.36                                           | 0.49                                           | -                                              | 0.41                                           | 0.29                                           | 0.39                                           | 0.32                                           | 0.47                                           | 0.35                                           | 0.61                                           | 0.42                                           | 0.37                                           | 0.42                                           |
|          | SE Asia           | 0.37                                           | 0.35                                           | 0.27                                           | 0.32                                           | -                                              | 0.41                                           | 0.22                                           | 0.34                                           | 0.41                                           | 0.36                                           | <b>1.68<sup>§</sup></b><br><b>(0.40, 3.26)</b> | 0.28                                           | 0.25                                           | 0.32                                           |
|          | Europe            | 0.34                                           | 0.29                                           | 0.36                                           | 0.28                                           | 0.38                                           | -                                              | 0.37                                           | 0.39                                           | 0.35                                           | 0.30                                           | 0.39                                           | 0.45                                           | <b>1.35</b>                                    | 0.57                                           |
|          | North<br>America  | 0.27                                           | 0.26                                           | 0.38                                           | 0.31                                           | 0.37                                           | 0.27                                           | -                                              | 0.48                                           | 0.39                                           | 0.39                                           | 0.36                                           | 0.32                                           | 0.55                                           | <b>0.60<sup>§</sup></b><br><b>(0.01, 1.49)</b> |
| Wild     | Japan/<br>S Korea | <b>1.36<sup>†</sup></b><br><b>(0.12, 2.81)</b> | 0.66                                           | <b>1.46<sup>§</sup></b><br><b>(0.03, 3.82)</b> | 0.41                                           | 0.33                                           | 0.40                                           | 0.28                                           | -                                              | 0.60                                           | 0.40                                           | 0.43                                           | 0.39                                           | 0.68                                           | <b>1.58<sup>§</sup></b><br><b>(0.21, 3.27)</b> |
|          | E China           | <b>1.68<sup>†</sup></b><br><b>(0.31, 3.12)</b> | 0.78                                           | <b>3.05<sup>§</sup></b><br><b>(0.17, 5.76)</b> | <b>0.93<sup>†</sup></b><br><b>(0.14, 1.95)</b> | 0.32                                           | 0.46                                           | 0.25                                           | <b>1.16<sup>‡</sup></b><br><b>(0.17, 2.46)</b> | -                                              | 0.43                                           | 0.39                                           | 0.40                                           | <b>0.80<sup>†</sup></b><br><b>(0.09, 1.61)</b> | <b>1.19<sup>†</sup></b><br><b>(0.17, 2.35)</b> |
|          | C China           | 0.42                                           | 0.52                                           | 0.46                                           | 0.47                                           | 0.37                                           | 0.24                                           | 0.35                                           | 0.52                                           | 0.79                                           | -                                              | 0.36                                           | 0.35                                           | 0.53                                           | 0.77                                           |
|          | SE Asia           | 0.31                                           | 0.29                                           | 0.36                                           | 0.37                                           | <b>0.38</b>                                    | 0.35                                           | 0.45                                           | 0.32                                           | 0.32                                           | 0.30                                           | -                                              | 0.43                                           | 0.29                                           | 0.39                                           |
|          | Middle<br>East    | 0.39                                           | 0.36                                           | 0.40                                           | 0.42                                           | 0.56                                           | 0.30                                           | 0.43                                           | 0.46                                           | 0.41                                           | 0.27                                           | <b>0.67<sup>§</sup></b><br><b>(0.04, 1.62)</b> | -                                              | 0.42                                           | 0.56                                           |
|          | Europe            | 0.17                                           | 0.18                                           | 0.22                                           | 0.20                                           | 0.15                                           | <b>2.33<sup>§</sup></b><br><b>(0.53, 4.17)</b> | 0.19                                           | 0.27                                           | 0.27                                           | 0.23                                           | 0.32                                           | <b>0.61<sup>§</sup></b><br><b>(0.06, 1.26)</b> | -                                              | 0.35                                           |
|          | North<br>America  | 0.10                                           | 0.12                                           | 0.15                                           | 0.17                                           | 0.10                                           | 0.12                                           | <b>0.41<sup>§</sup></b><br><b>(0.07, 0.86)</b> | 0.12                                           | 0.28                                           | 0.21                                           | 0.10                                           | 0.09                                           | <b>0.23<sup>§</sup></b><br><b>(0.01, 0.53)</b> | -                                              |

BSSV statistically supported migration rates with 95% Bayesian credible intervals (BCI), where the Bayes factor was >12. <sup>†</sup> 12 > BF ≥ 30; <sup>‡</sup> 30 > BF ≥ 100; <sup>§</sup> BF > 100
