# Supplementary material for: Ecosystem Interactions Underlie the Spread of Avian Influenza A Viruses with Pandemic Potential
Source: PubMed Central journal article supplement (PMC4864295; doi:10.1371/journal.ppat.1005620), 2016-05-11

Figure S2

A

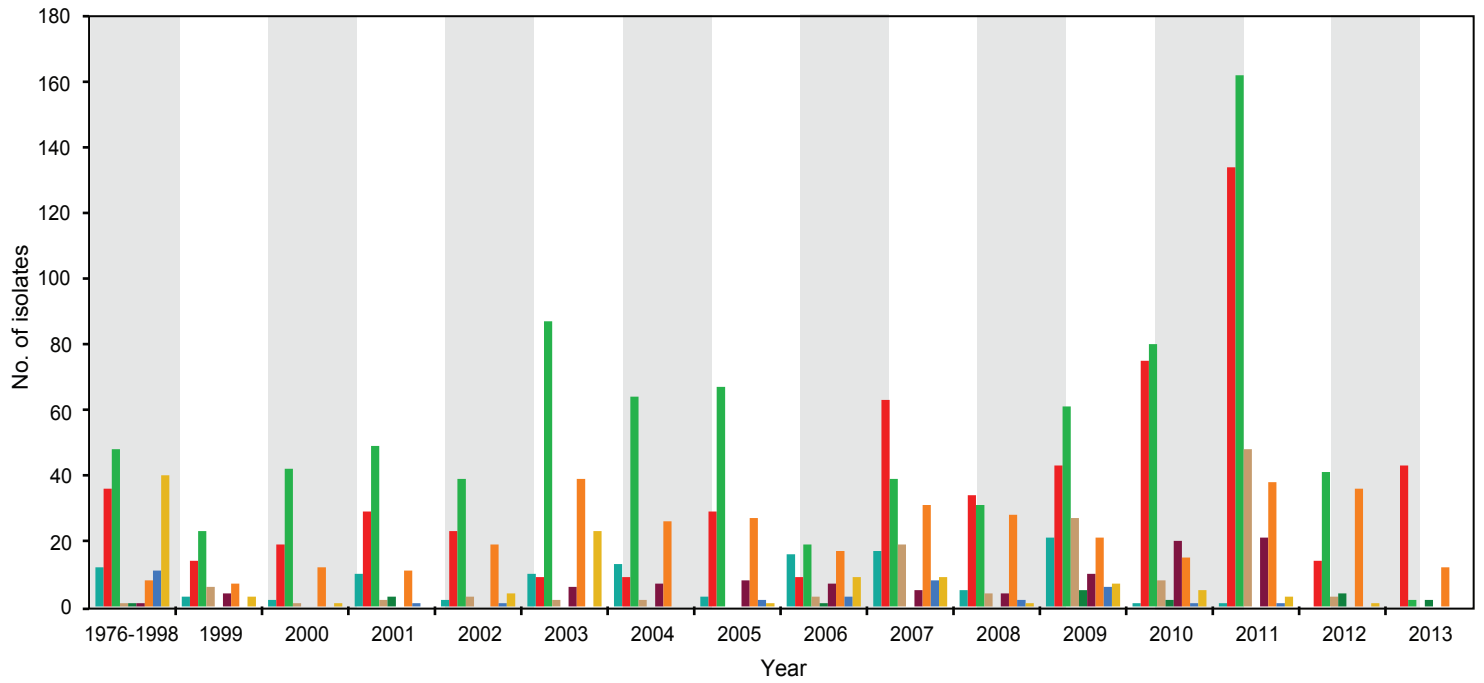

■ Japan/ South Korea    
 ■ East China    
 ■ Western China    
 ■ South Asia    
 ■ Europe  
■ Central China    
■ South East Asia    
■ Middle East/ Central Asia    
■ North America

B

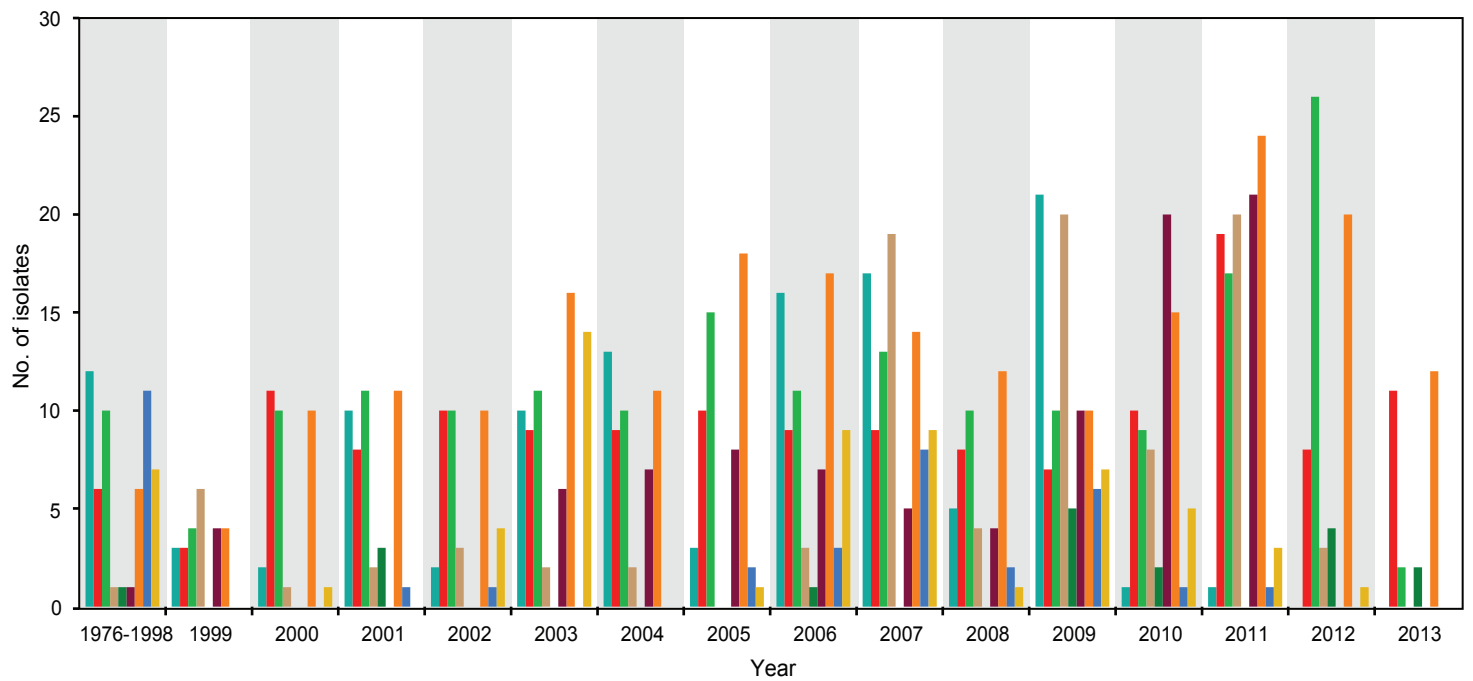

Supplement: ppat.1005620.s008.pdf [file ppat.1005620.s008.pdf]
