# Supplementary material for: Ecosystem Interactions Underlie the Spread of Avian Influenza A Viruses with Pandemic Potential
Source: PubMed Central journal article supplement (PMC4864295; doi:10.1371/journal.ppat.1005620), 2016-05-11
Supplement: ppat.1005620.s010.pdf [file ppat.1005620.s010.pdf]

Figure S4

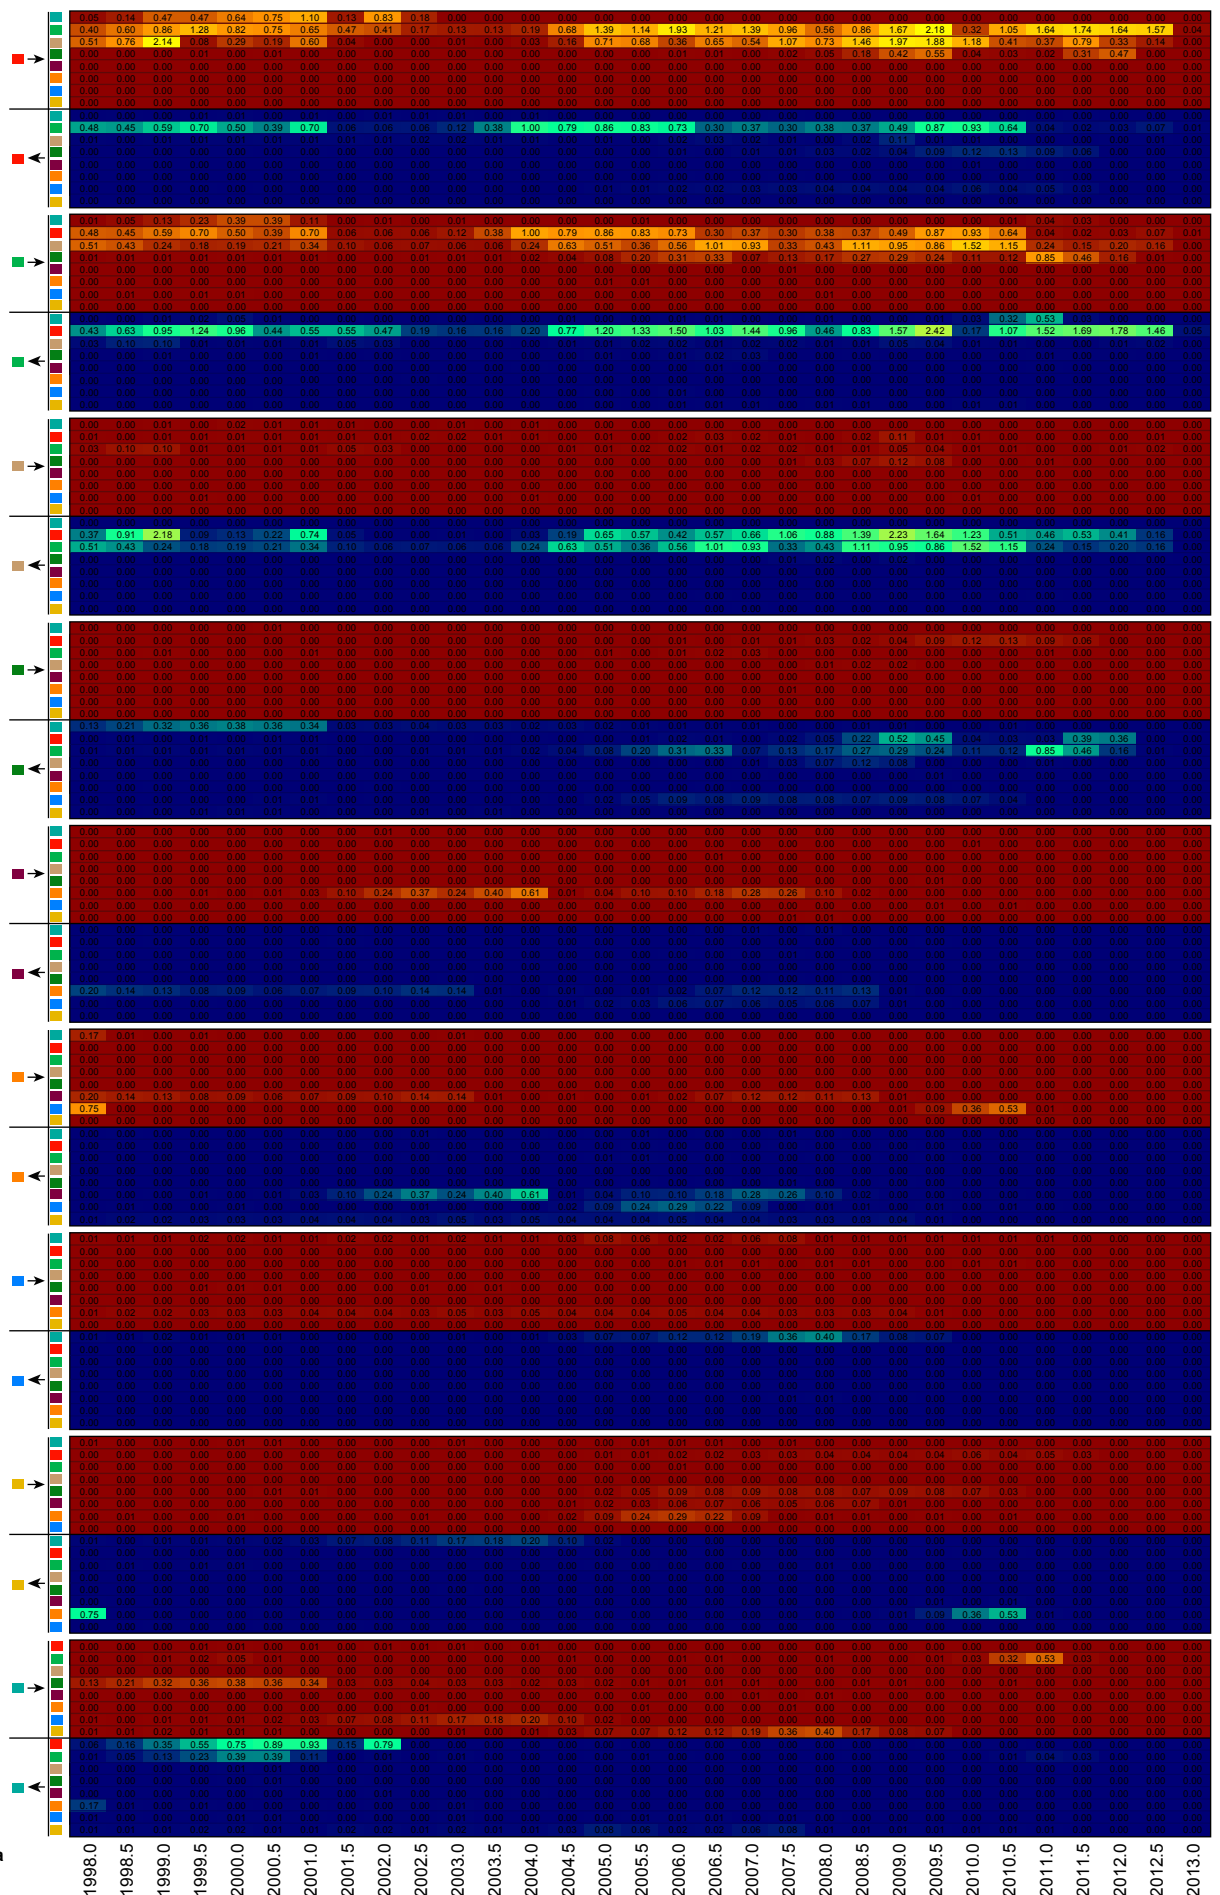

- Japan/South Korea
- East China
- Central China
- Western China
- South East Asia
- South Asia
- Middle East/Central Asia
- Europe
- North America

Source/Sink

0 2.2 2.5
