# Supplementary material for: Ecosystem Interactions Underlie the Spread of Avian Influenza A Viruses with Pandemic Potential
Source: PubMed Central journal article supplement (PMC4864295; doi:10.1371/journal.ppat.1005620), 2016-05-11
Supplement: ppat.1005620.s012.pdf [file ppat.1005620.s012.pdf]

Figure S6

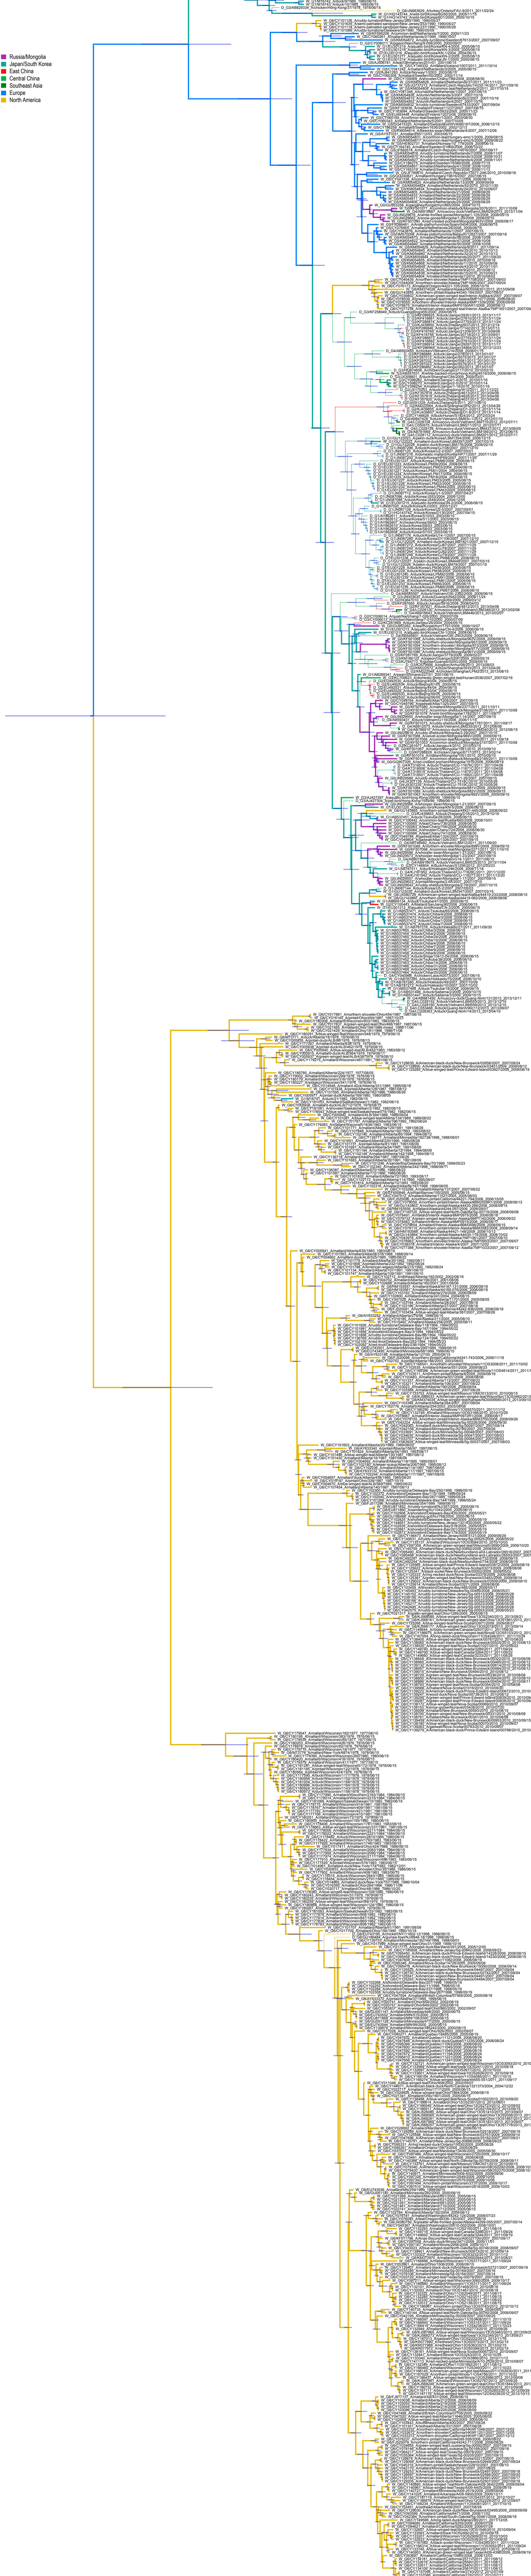

- Russia/Mongolia
- Japan/South Korea
- East China
- Central China
- Southeast Asia
- Europe
- North America

1920 1930 1940 1950 1960 1970 1980 1990 2000 2010
