# Supplementary material for: Ecosystem Interactions Underlie the Spread of Avian Influenza A Viruses with Pandemic Potential
Source: PubMed Central journal article supplement (PMC4864295; doi:10.1371/journal.ppat.1005620), 2016-05-11

Figure S12

A

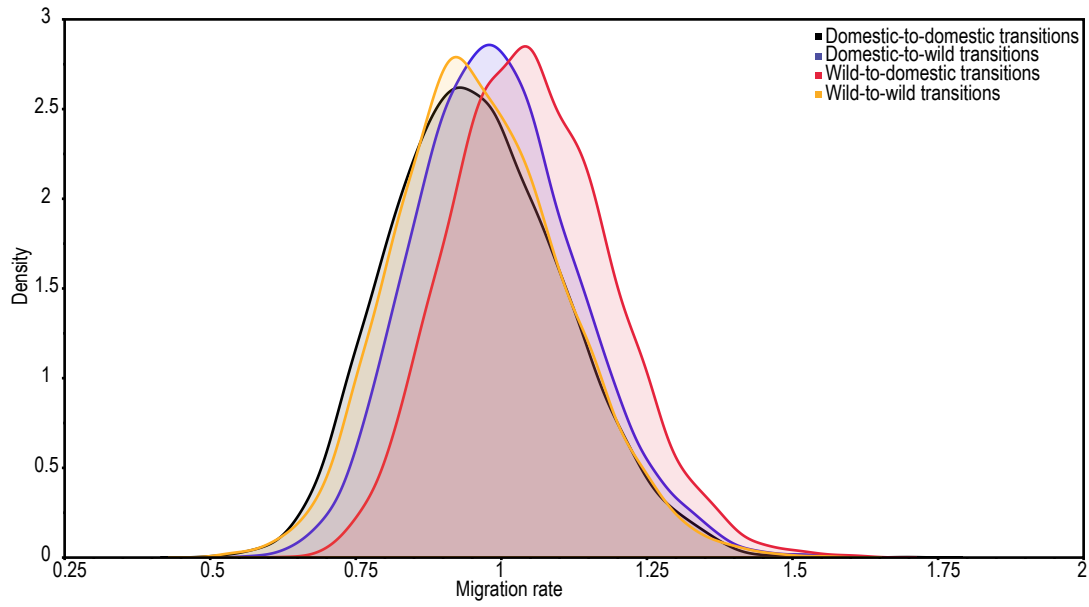

B

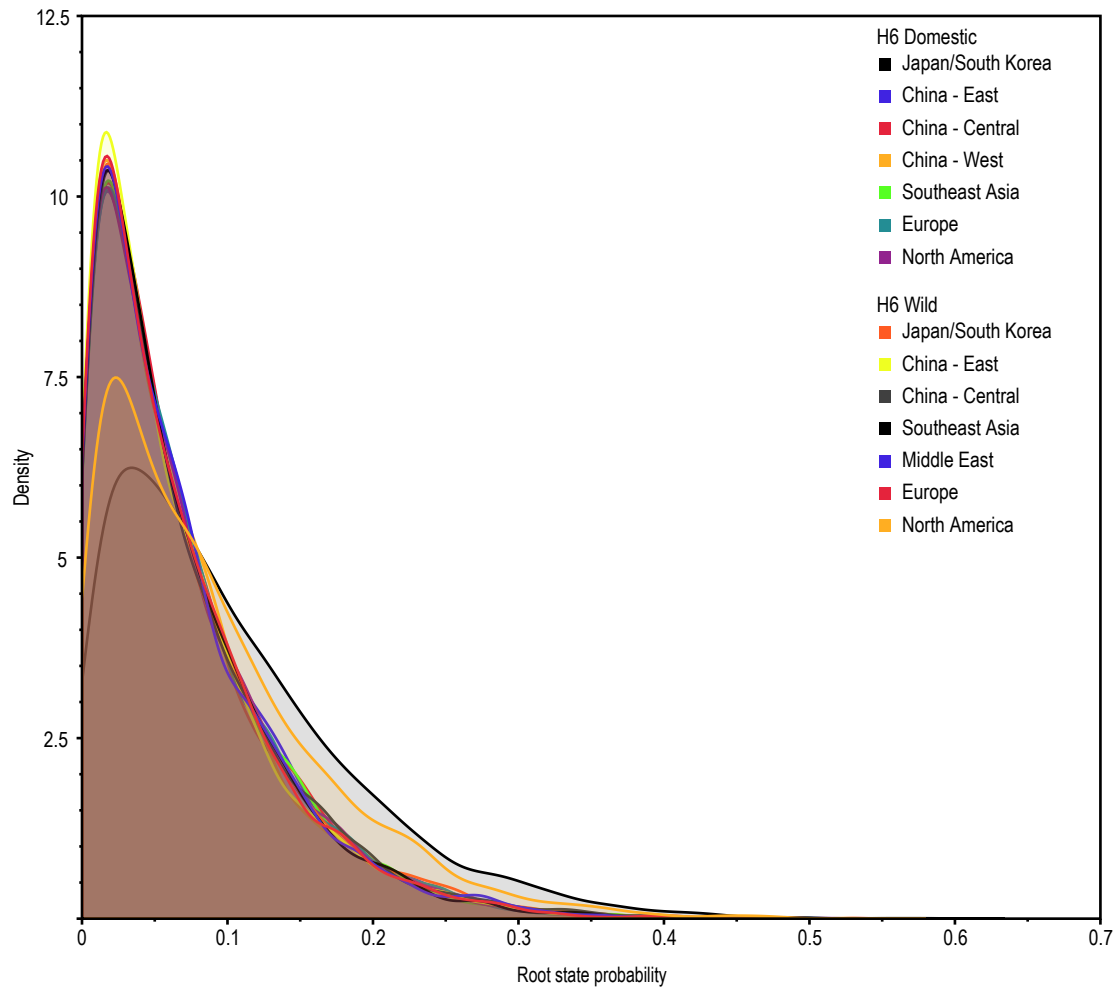

Supplement: ppat.1005620.s018.pdf [file ppat.1005620.s018.pdf]
